# Supplementary material for: KL-6 as an Immunological Biomarker Predicts the Severity, Progression, Acute Exacerbation, and Poor Outcomes of Interstitial Lung Disease: A Systematic Review and Meta-Analysis
Source: PubMed Central journal article supplement (PMC8699527; doi:10.3389/fimmu.2021.745233), 2021-12-09
Supplement: DataSheet_1.pdf [file DataSheet_1.pdf]

*Supplementary Material*

**Supplementary Table 1: Database search.**

| <b>PubMed</b> |                                                   |             |            | <b>EBSCO</b> |                                        |             |            | <b>Cochrane</b> |                                             |        |            |
|---------------|---------------------------------------------------|-------------|------------|--------------|----------------------------------------|-------------|------------|-----------------|---------------------------------------------|--------|------------|
| Search        | Query                                             | Items found | Date       | Search       | Query                                  | Items found | Date       | Search          | Items found                                 | Date   |            |
| #1            | Search progression[Title/Abstract]                | 563,335     | 2021.04.01 | #1           | Search progression:ab,ti               | 15,985      | 2021.04.01 | #1              | Search (progression):ti,ab,kw               | 98,990 | 2021.04.01 |
| #2            | Search progressive[Title/Abstract]                | 278,209     | 2021.04.01 | #2           | Search progressive:ab,ti               | 24,448      | 2021.04.01 | #2              | Search (progressive):ti,ab,kw               | 98,972 | 2021.04.01 |
| #3            | Search #1 OR #2                                   | 806,847     | 2021.04.01 | #3           | Search #1 OR #2                        | 40,383      | 2021.04.01 | #3              | Search #1 OR #2                             | 98,993 | 2021.04.01 |
| #4            | Search interstitial lung disease [Title/Abstract] | 10,413      | 2021.04.01 | #4           | Search interstitial lung disease:ab,ti | 1997        | 2021.04.01 | #4              | Search (interstitial lung disease):ti,ab,kw | 1,507  | 2021.04.01 |
| #5            | Search ILD[Title/Abstract]                        | 4,850       | 2021.04.01 | #5           | Search ILD:ab,ti                       | 1108        | 2021.04.01 | #5              | Search (ILD):ti,ab,kw                       | 606    | 2021.04.01 |
| #6            | Search ILDs[Title/Abstract]                       | 779         | 2021.04.01 | #6           | Search ILDs:ab,ti                      | 1108        | 2021.04.01 | #6              | Search (ILDs):ti,ab,kw                      | 594    | 2021.04.01 |
| #7            | Search #4 OR #5 OR #6                             | 11,587      | 2021.04.01 | #7           | Search #4 OR #5 OR #6                  | 1750        | 2021.04.01 | #7              | Search #4 OR #5 #6                          | 1,614  | 2021.04.01 |
| #8            | Search KL-6[Title/Abstract]                       | 790         | 2021.04.01 | #8           | Search KL-6;ab,ti                      | 170         | 2021.04.01 | #8              | Search (KL-6):ti,ab,kw                      | 65     | 2021.04.01 |
| #9            | Search Krebs von den Lungen-6 [Title/Abstract]    | 259         | 2021.04.01 | #9           | Search Krebs von den Lungen-6:ab,ti    | 6           | 2021.04.01 | #9              | Search (Krebs von den Lungen-6):ti,ab,kw    | 17     | 2021.04.01 |
| #10           | Search #8 OR #9                                   | 856         | 2021.04.01 | #10          | Search #8 OR #9                        | 116         | 2021.04.01 | #10             | Search #8 OR #9                             | 72     | 2021.04.01 |
| #11           | Search #3 AND #7 AND #10                          | 341         | 2021.04.01 | #11          | Search #3 AND #7 AND #10               | 639         | 2021.04.01 | #11             | Search #3 AND #7 AND #10                    | 503    | 2021.04.01 |

## Supplementary Table 2: Reasons for study exclusion.

### (1) No available data about KL-6 and ILD or not refer to the severity and progression of ILD (N=24).

1. Al-Salmi, Q. A., Walter, J. N., Colasurdo, G. N., Sockrider, M. M., Smith, E. O., Takahashi, H., & Fan, L. L. (2005). Serum KL-6 and surfactant proteins A and D in pediatric interstitial lung disease. *Chest*, 127(1), 403-407. doi:10.1378/chest.127.1.403
2. Benyamine, A., Heim, X., Resseguier, N., Bertin, D., Gomez, C., Ebbo, M., . . . Granel, B. (2018). Elevated serum Krebs von den Lungen-6 in systemic sclerosis: a marker of lung fibrosis and severity of the disease. *Rheumatol Int*, 38(5), 813-819. doi:10.1007/s00296-018-3987-3
3. Bergantini, L., d'Alessandro, M., Vietri, L., Rana, G. D., Cameli, P., Acerra, S., . . . Bargagli, E. (2020). Utility of serological biomarker panels for diagnostic accuracy of interstitial lung diseases. *Immunol Res*, 68(6), 414-421. doi:10.1007/s12026-020-09158-0
4. Cummings, K. J., Virji, M. A., Trapnell, B. C., Carey, B., Healey, T., & Kreiss, K. (2014). Early changes in clinical, functional, and laboratory biomarkers in workers at risk of indium lung disease. *Ann Am Thorac Soc*, 11(9), 1395-1403. doi:10.1513/AnnalsATS.201407-346OC
5. d'Alessandro, M., Bergantini, L., Cameli, P., Pieroni, M., Refini, R. M., Sestini, P., & Bargagli, E. (2021). Serum Concentrations of KL-6 in Patients with IPF and Lung Cancer and Serial Measurements of KL-6 in IPF Patients Treated with Antifibrotic Therapy. *Cancers (Basel)*, 13(4). doi:10.3390/cancers13040689
6. Endo, Y., Koga, T., Suzuki, T., Hara, K., Ishida, M., Fujita, Y., . . . Kawakami, A. (2018). Successful treatment of plasma exchange for rapidly progressive interstitial lung disease with anti-MDA5 antibody-positive dermatomyositis: A case report. *Medicine (Baltimore)*, 97(15), e0436. doi:10.1097/md.00000000000010436
7. Fathi, M., Barbasso Helmers, S., & Lundberg, I. E. (2012). KL-6: a serological biomarker for interstitial lung disease in patients with polymyositis and dermatomyositis. *J Intern Med*, 271(6), 589-597. doi:10.1111/j.1365-2796.2011.02459.x
8. Frix, A. N., Schoneveld, L., Ladang, A., Henket, M., Duysinx, B., Vaillant, F., . . . Guiot, J. (2020). Could KL-6 levels in COVID-19 help to predict lung disease? *Respir Res*, 21(1), 309. doi:10.1186/s12931-020-01560-4
9. Furukawa, H., Oka, S., Shimada, K., Hashimoto, A., Komiyama, A., Matsui, T., & Tohma, S. (2019). Role of Deleterious Rare Alleles for Acute-Onset Diffuse Interstitial Lung Disease in Collagen Diseases. *Clin Med Insights Circ Respir Pulm Med*, 13, 1179548419866443. doi:10.1177/1179548419866443
10. Hamada, T., Samukawa, T., Kumamoto, T., Hatanaka, K., Tsukuya, G., Yamamoto, M., . . . Inoue, H. (2015). Serum B cell-activating factor (BAFF) level in connective tissue disease associated interstitial lung disease. *BMC Pulm Med*, 15, 110. doi:10.1186/s12890-015-0105-0
11. Hua-Huy, T., Rivière, S., Tiev, K. P., & Dinh-Xuan, A. T. (2014). [Use of pulmonary function tests and biomarkers studies to diagnose and follow-up interstitial lung disease in systemic sclerosis]. *Rev Pneumol Clin*, 70(6), 335-342. doi:10.1016/j.pneumo.2014.09.003
12. Ikuyama, Y., Ushiki, A., Kosaka, M., Akahane, J., Mukai, Y., Araki, T., . . . Hanaoka, M. (2020). Prognosis of patients with acute exacerbation of combined pulmonary fibrosis and emphysema: a retrospective single-centre study. *BMC Pulm Med*, 20(1), 144. doi:10.1186/s12890-020-01185-9
13. Inoue, Y., Kaner, R. J., Guiot, J., Maher, T. M., Tomassetti, S., Moiseev, S., . . . Brown, K. K. (2020). Diagnostic and Prognostic Biomarkers for Chronic Fibrosing Interstitial Lung Diseases With a Progressive Phenotype. *Chest*, 158(2), 646-659. doi:10.1016/j.chest.2020.03.037
14. Ishiguro, T., Yasui, M., Takato, H., Kimura, H., Katayama, N., Kasahara, K., & Fujimura, M. (2007). Progression of interstitial lung disease upon overlapping of systemic sclerosis with polymyositis. *Intern Med*, 46(15), 1237-1241. doi:10.2169/internalmedicine.46.0135
15. Ishii, H., Kinoshita, Y., Kushima, H., Nagata, N., & Watanabe, K. (2019). The similarities and differences between pleuroparenchymal fibroelastosis and idiopathic pulmonary fibrosis. *Chron Respir Dis*, 16, 1479973119867945. doi:10.1177/1479973119867945
16. Kamio, K., Azuma, A., Ohta, K., Sugiyama, Y., Nukiwa, T., Kudoh, S., & Mizushima, T. (2014). Double-blind controlled trial of lecithinized superoxide dismutase in patients with idiopathic interstitial pneumonia - short term evaluation of safety and tolerability. *BMC Pulm Med*, 14, 86. doi:10.1186/1471-2466-14-86
17. Kaneko, Y., Nunokawa, T., Taniguchi, Y., Yamaguchi, Y., Gono, T., Masui, K., . . . Kuwana, M. (2020). Clinical characteristics of cancer-associated myositis complicated by interstitial lung disease: a large-scale multicentre cohort study. *Rheumatology (Oxford)*, 59(1), 112-119. doi:10.1093/rheumatology/kez238
18. Kawase, S., Hattori, N., Ishikawa, N., Horimasu, Y., Fujitaka, K., Furonaka, O., . . . Kohno, N. (2011). Change in serum KL-6 level from baseline is useful for predicting life-threatening EGFR-TKIs induced interstitial lung disease. *Respir Res*, 12(1), 97. doi:10.1186/1465-9921-12-97
19. Mimori, T., Nakashima, R., & Hosono, Y. (2012). Interstitial lung disease in myositis: clinical subsets, biomarkers, and treatment. *Curr Rheumatol Rep*, 14(3), 264-274. doi:10.1007/s11926-012-0246-6
20. Miyazaki, K., Kurishima, K., Kagohashi, K., Kawaguchi, M., Ishikawa, H., Satoh, H., & Hizawa, N. (2010). Serum KL-6 levels in lung cancer patients with or without interstitial lung disease. *J Clin Lab Anal*, 24(5), 295-299. doi:10.1002/jcla.20404
21. Mizuno, R., Asano, K., Mikami, S., Nagata, H., Kaneko, G., & Oya, M. (2012). Patterns of interstitial lung disease during everolimus treatment in patients with metastatic renal cell carcinoma. *Jpn J Clin Oncol*, 42(5), 442-446. doi:10.1093/jjco/hys033
22. Okuda, R., Matsushima, H., Aoshiba, K., Oba, T., Kawabe, R., Honda, K., & Amano, M. (2015). Soluble intercellular adhesion molecule-1 for stable and acute phases of idiopathic pulmonary fibrosis. *Springerplus*, 4, 657. doi:10.1186/s40064-015-1455-z
23. Salazar, G. A., Kuwana, M., Wu, M., Estrada, Y. M. R. M., Ying, J., Charles, J., . . . Assassi, S. (2018). KL-6 But Not CCL-18 Is a Predictor of Early Progression in Systemic Sclerosis-related Interstitial Lung Disease. *J Rheumatol*, 45(8), 1153-1158. doi:10.3899/jrheum.170518
24. Shimoda, M., Tanaka, Y., Fujiwara, K., Furuuchi, K., Osawa, T., Morimoto, K., . . . Ohta, K. (2021). Waterproofing spray-associated pneumonitis review: Comparison with acute eosinophilic pneumonia and hypersensitivity pneumonitis. *Medicine (Baltimore)*, 100(10), e25054. doi:10.1097/md.00000000000025054

### (2) No clear definition of severe ILD or progressive ILD (N=3)

1. Cao, X., Hu, S., Xu, D., Li, M., Wang, Q., & Hou, Y., et al. (2019). Serum levels of krebs von den lungen - 6 as a promising marker for predicting occurrence and deterioration of systemic sclerosis - associated interstitial lung disease from a chinese cohort. *Wiley-Blackwell Online Open*, 22(1). doi: 10.1111/1756-185X.13452
2. Arai, T., Akira, M., Sugimoto, C., Tachibana, K., & Inoue, Y. (2020). Seroradiologic prognostic evaluation of acute exacerbation in patients with idiopathic interstitial pneumonia: a retrospective observational study. *Journal of Thoracic Disease*, 12(8), 4132-4147. doi: 10.21037/jtd-20-911
3. Kobayashi, N., Kobayashi, I., Mori, M., Sato, S., Iwata, N., & Shigemura, T., et al. (2015). Increased serum b cell activating factor and a proliferation-inducing ligand are associated with interstitial lung disease in patients with juvenile dermatomyositis. *Journal of Rheumatology*, 24(12-8). doi:10.3899/jrheum.140977

### (3) Non-English article (N=1)

1. Hua-Huy, T., Rivière, S., Tiev, K. P., & Dinh-Xuan, A. T. (2014). [use of pulmonary function tests and biomarkers studies to diagnose and follow-up interstitial lung disease in systemic sclerosis]. *Revue de Pneumologie Clinique*, 70(6), 335-42. doi: 10.1016/j.pneumo.2014.09.003

### (4) Patients were from the same medical institution (N=2)

1. Choi, S., Won, Y. L., & D Kim. (2013). Subclinical interstitial lung damage in workers exposed to indium compounds. *Annals of Occupational & Environmental Medicine*, 25(1), 24-24. doi: 10.1186/2052-4374-25-24
2. Kakugawa, T., Yokota, S. I., Ishimatsu, Y., Hayashi, T., Nakashima, S., & Hara, S., et al. (2014). Serum heat shock protein 47 levels are elevated in acute interstitial pneumonia. *BMC Pulmonary Medicine*, 14(1)(2014-03-21), 14. doi: 10.1186/1471-2466-14-48

**Supplementary Table 3: The included studies depicted the difference of KL-6 level between mild ILD and severe ILD.**

| author                | study               | country | follow up | KL-6 in Mild ILD (U/ml) |         |        | KL-6 in Severe ILD (U/ml) |         |        |
|-----------------------|---------------------|---------|-----------|-------------------------|---------|--------|---------------------------|---------|--------|
|                       |                     |         |           | Mean                    | SD      | Sample | Mean                      | SD      | Sample |
| Atsushi Suzuki, 2018  | cohort study        | Japan   | 0.25      | 1811.75                 | 1138.07 | 49     | 2042.73                   | 787.62  | 13     |
| Carmel JW Stock, 2021 | cohort study        | UK      | 4         | 1234.11                 | 974.35  | 42     | 1817.14                   | 1340.45 | 72     |
| Masataka Kuwana, 2016 | cohort study        | Japan   | 14.45     | 694                     | 322     | 34     | 2189                      | 904     | 16     |
| Ying Jiang, 2018      | observational study | China   | 1         | 996                     | 1343.3  | 210    | 1484.5                    | 1915.5  | 122    |

**Supplementary Table 4: The included studies depicted the difference of KL-6 level between progressive ILD and non-progressive ILD.**

| author                   | study               | country | follow up | KL-6 in Progressive ILD (U/ml) |         |        | KL-6 in Non-progressive ILD (U/ml) |         |        |
|--------------------------|---------------------|---------|-----------|--------------------------------|---------|--------|------------------------------------|---------|--------|
|                          |                     |         |           | Mean                           | SD      | Sample | Mean                               | SD      | Sample |
| Hasegawa M, 2011         | longitudinal study  | Japan   | NG        | 1225.1                         | 630.7   | 18     | 467.5                              | 231.2   | 38     |
| Hideaki Yamakawa, 2019   | retrospective study | Japan   | 12.5      | 1456                           | 730.6   | 13     | 1856                               | 1319.8  | 62     |
| Jeong Seok Lee, 2019     | retrospective study | Korean  | 13        | 957.2                          | 720.2   | 28     | 727.4                              | 773.9   | 65     |
| Jingxian Wang, 2020      | retrospective study | China   | 0.25      | 1149.23                        | 1523.82 | 13     | 1090.06                            | 783.39  | 14     |
| Kashiwabara, K, 2006     | observational study | Japan   | NG        | 607                            | 297     | 7      | 318                                | 143     | 14     |
| Mirei Shirakashi, 2020   | retrospective study | Japan   | 0.5       | 806.47                         | 559.31  | 13     | 597.38                             | 226.96  | 25     |
| Norimoto Kobayashi, 2015 | case control study  | Japan   | 4         | 2045.6                         | 881.5   | 10     | 718.3                              | 699     | 19     |
| Sungyeul Choi, 2015      | observational study | Korean  | 1.4       | 1179.9                         | 1.5     | 12     | 727.9                              | 1.7     | 38     |
| Takumi Yoshikawa, 2020   | cohort study        | Japan   | 0.5       | 1069.57                        | 537.01  | 17     | 1285.36                            | 1202.95 | 32     |
| Tomoya Sagawa, 2019      | cohort study        | Japan   | 8.8       | 1191.26                        | 525.01  | 15     | 695.15                             | 374.93  | 14     |
| Ui Won K, 2020           | cohort study        | Korean  | 0.925     | 826.3                          | 531.6   | 43     | 629                                | 529     | 156    |
| Yoshihisa Nukui, 2019    | retrospective study | Japan   | 0.5       | 2440.29                        | 7654.62 | 14     | 1437.3                             | 1077.72 | 34     |

**Supplementary Table 5: The included studies depicted the difference of KL-6 level between survivors of ILD and death of ILD.**

| author                  | study               | country | follow up | KL-6 in Survivor of ILD(U/ml) |         |        | KL-6 in Death of ILD (U/ml) |         |        |
|-------------------------|---------------------|---------|-----------|-------------------------------|---------|--------|-----------------------------|---------|--------|
|                         |                     |         |           | Mean                          | SD      | Sample | Mean                        | SD      | Sample |
| Fotoh, D, 2021          | case-control study  | America | 1         | 860.1                         | 424.1   | 50     | 1356.2                      | 69.1    | 25     |
| Ho Cheol Kim, 2020      | retrospective study | Korea   | 5.08      | 699.5                         | 403.32  | 51     | 1353.66                     | 932.95  | 33     |
| Jin Woo Song, 2013      | retrospective study | Korea   | 2         | 1099                          | 796.1   | 54     | 1851.7                      | 1268.4  | 64     |
| Kaiwen Wang, 2019       | case control study  | China   | 0.5       | 1234.54                       | 1694.12 | 68     | 1276.77                     | 1301.34 | 17     |
| Kota Murohashi, 2019    | retrospective study | Japan   | 0.25      | 1492.07                       | 1675.32 | 48     | 1383.25                     | 1470.21 | 20     |
| Kota Nakamura, 2017     | case control study  | Japan   | 0.125     | 137                           | 147.62  | 24     | 314                         | 208.77  | 12     |
| Lu Guo, 2020            | cohort study        | China   | 5         | 535.3                         | 214.2   | 57     | 1360.9                      | 497.4   | 69     |
| Naomi Yoshida, 2017     | case control study  | Japan   | 0.25      | 1171.81                       | 823.48  | 18     | 743.93                      | 156.39  | 4      |
| Qihua Yang, 2021        | cohort study        | China   | 0.5       | 973.27                        | 488.35  | 68     | 2426.77                     | 2624.4  | 22     |
| Satoshi Ikeda, 2015     | retrospective study | Japan   | NG        | 1097.5                        | 212.5   | 4      | 536                         | 103.8   | 6      |
| Tomoo Kishaba, 2012     | cohort study        | Japan   | 5         | 852                           | 278     | 26     | 1174                        | 725     | 67     |
| Takahisa Gono, 2010     | retrospective study | Japan   | 17        | 809.44                        | 611.86  | 9      | 1057.45                     | 844.86  | 5      |
| Tomoyuki Kakugawa, 2013 | retrospective study | Japan   | NG        | 502                           | 935     | 44     | 1544                        | 57.5    | 3      |
| TOSHIKI YOKOYAMA, 2012  | cohort study        | Japan   | 0.274     | 1515.7                        | 837.3   | 26     | 3015.4                      | 1854.2  | 12     |
| Yumiko Sugiyama, 2018   | case control study  | Japan   | 0.5       | 807.22                        | 614.47  | 102    | 1028.02                     | 342.16  | 14     |

**Supplementary Table 6: The included studies depicted the difference of KL-6 level between AE-ILD and stable ILD.**

| author                  | study               | country | follow up | KL-6 in AE of ILD (U/ml) |         |        | KL-6 in stable ILD (U/ml) |         |        |
|-------------------------|---------------------|---------|-----------|--------------------------|---------|--------|---------------------------|---------|--------|
|                         |                     |         |           | Mean                     | SD      | Sample | Mean                      | SD      | Sample |
| Kaixiong Liu, 2020      | case-control study  | China   | 2         | 1958                     | 61.51   | 34     | 1496                      | 59.57   | 49     |
| Motoki Yano, 2012       | cohort study        | Japan   | 6.66      | 1143                     | 518     | 6      | 610                       | 392     | 56     |
| Tetsuya Taya, 2019      | retrospective study | Japan   | 4         | 1011.69                  | 768.72  | 14     | 629.01                    | 504.52  | 84     |
| Tomoyuki Kakugawa, 2016 | cohort study        | Japan   | 2.6       | 1316.625                 | 315.375 | 24     | 912                       | 301.75  | 41     |
| Yan Ye, 2019            | cohort study        | China   | 1         | 3262                     | 2124    | 19     | 734.5                     | 331.8   | 20     |
| Yang Hu, 2017           | case control study  | China   | NG        | 2351.53                  | 3697.22 | 15     | 1046.35                   | 1165.09 | 48     |

**Supplementary Table 7: The included studies depicted the high KL-6 level predicting the hazard ratio of progression about ILD.**

| author                      | study               | country | HR    | Low limitation | Upper limitation | P value |
|-----------------------------|---------------------|---------|-------|----------------|------------------|---------|
| CARMEL J.W. STOCK, 2021     | cohort study        | UK      | 3.4   | 1.53           | 7.53             | 0.003   |
| Elizabeth R. Volkmann, 2019 | cohort study        | Italy   | 1.13  | 0.5            | 2.58             | 0.0767  |
| Satoshi Hanzawa, 2020       | observational study | Japan   | 1.06  | 1.01           | 1.11             | 0.01    |
| Ui Won K, 2020              | cohort study        | Korea   | 2.689 | 1.445          | 5.004            | 0.002   |
| Ying Jiang, 2018            | observational study | China   | 3.61  | 1.05           | 6.22             | 0.01    |

**Supplementary Table 8: The included studies depicted the high KL-6 level predicting the hazard ratio of mortality about ILD.**

| author                  | study               | country | HR    | Low limitation | Upper limitation | P value |
|-------------------------|---------------------|---------|-------|----------------|------------------|---------|
| Atsushi Suzuki, 2018    | cohort study        | Japan   | 1.239 | 1.05           | 1.461            | 0.011   |
| CARMEL J.W. STOCK, 2021 | cohort study        | UK      | 2.24  | 0.96           | 5.22             | 0.06    |
| Fujisawa, T, 2019       | retrospective study | Japan   | 9.19  | 1.6            | 174              | 0.01    |
| Gono, T, 2021           | cohort study        | Japan   | 6.0   | 1.8            | 19.8             | 0.003   |
| H. SATOH, 2006          | prospective study   | Japan   | 2.95  | 1.71           | 5.08             | 0.0001  |
| Ho Cheol Kim, 2020      | retrospective study | Korea   | 2.984 | 1.227          | 7.257            | 0.016   |
| Qihua Yang, 2021        | cohort study        | China   | 3.7   | 1.5            | 9.1              | 0.004   |
| Yan Ye, 2019            | cohort study        | China   | 1.09  | 0.932          | 1.241            | 0.041   |
| Ying Jiang, 2018        | observational study | China   | 1.901 | 1.294          | 2.793            | 0.001   |
| Yosuke Kamiya, 2019     | observational study | Japan   | 2.91  | 1.04           | 8.10             | 0.04    |

ILD: Interstitial Lung Disease

KL-6: Krebs von den Lungen-6

AE: Acute Exacerbation

HR: Hazard Ratio

**Supplementary Figure 1: The subgroup analysis in various specific ILDs about the WMD (95%CI) of KL-6 level between progressive ILD and non-progressive ILD.**

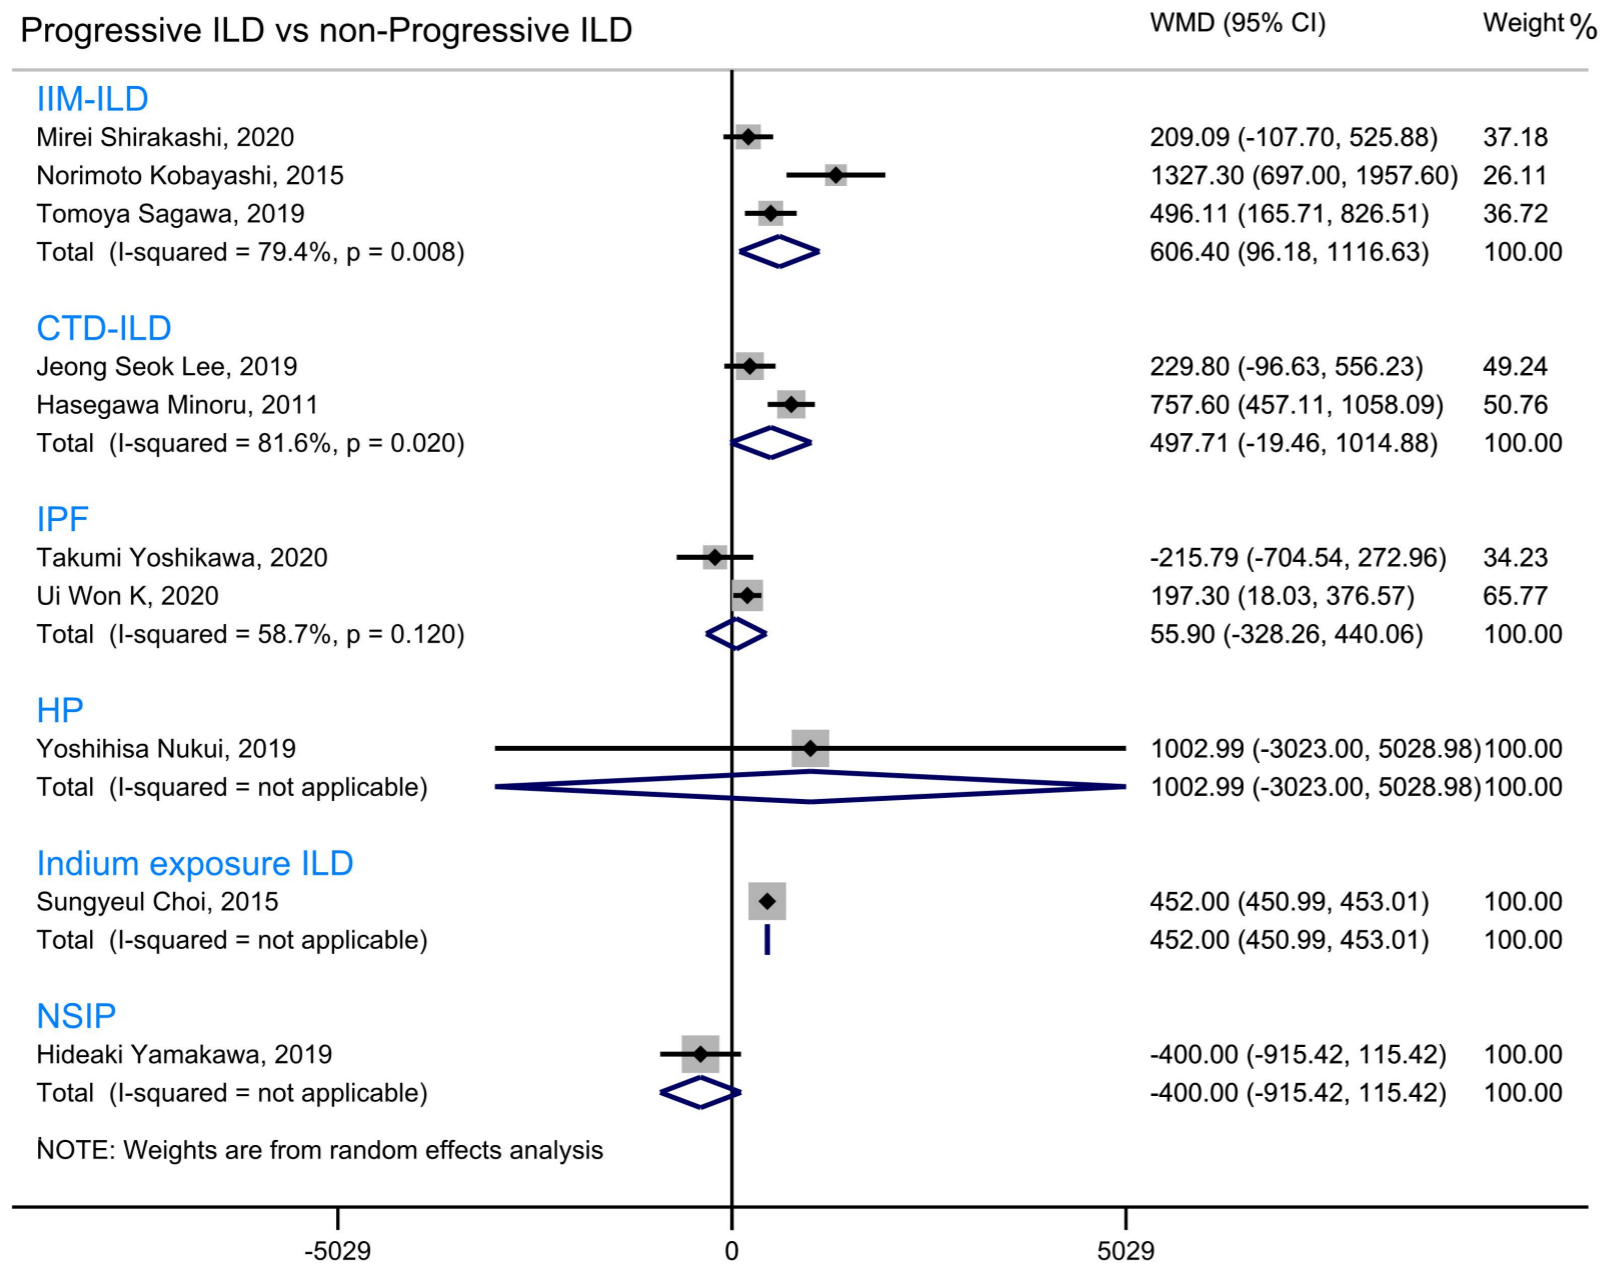

IIM-ILD: idiopathic inflammatory myopathy associated interstitial lung disease

CTD-ILD: connective tissue disease-associated interstitial lung disease

IPF: idiopathic pulmonary fibrosis

HP: hypersensitivity pneumonia

Drug induced ILD: Drug induced interstitial lung disease

NSIP: idiopathic non-specific interstitial pneumonia

**Supplementary Figure 2: The subgroup analysis in various specific ILDs about the WMD (95%CI) of KL-6 level between ILD survivor and death of ILD.**

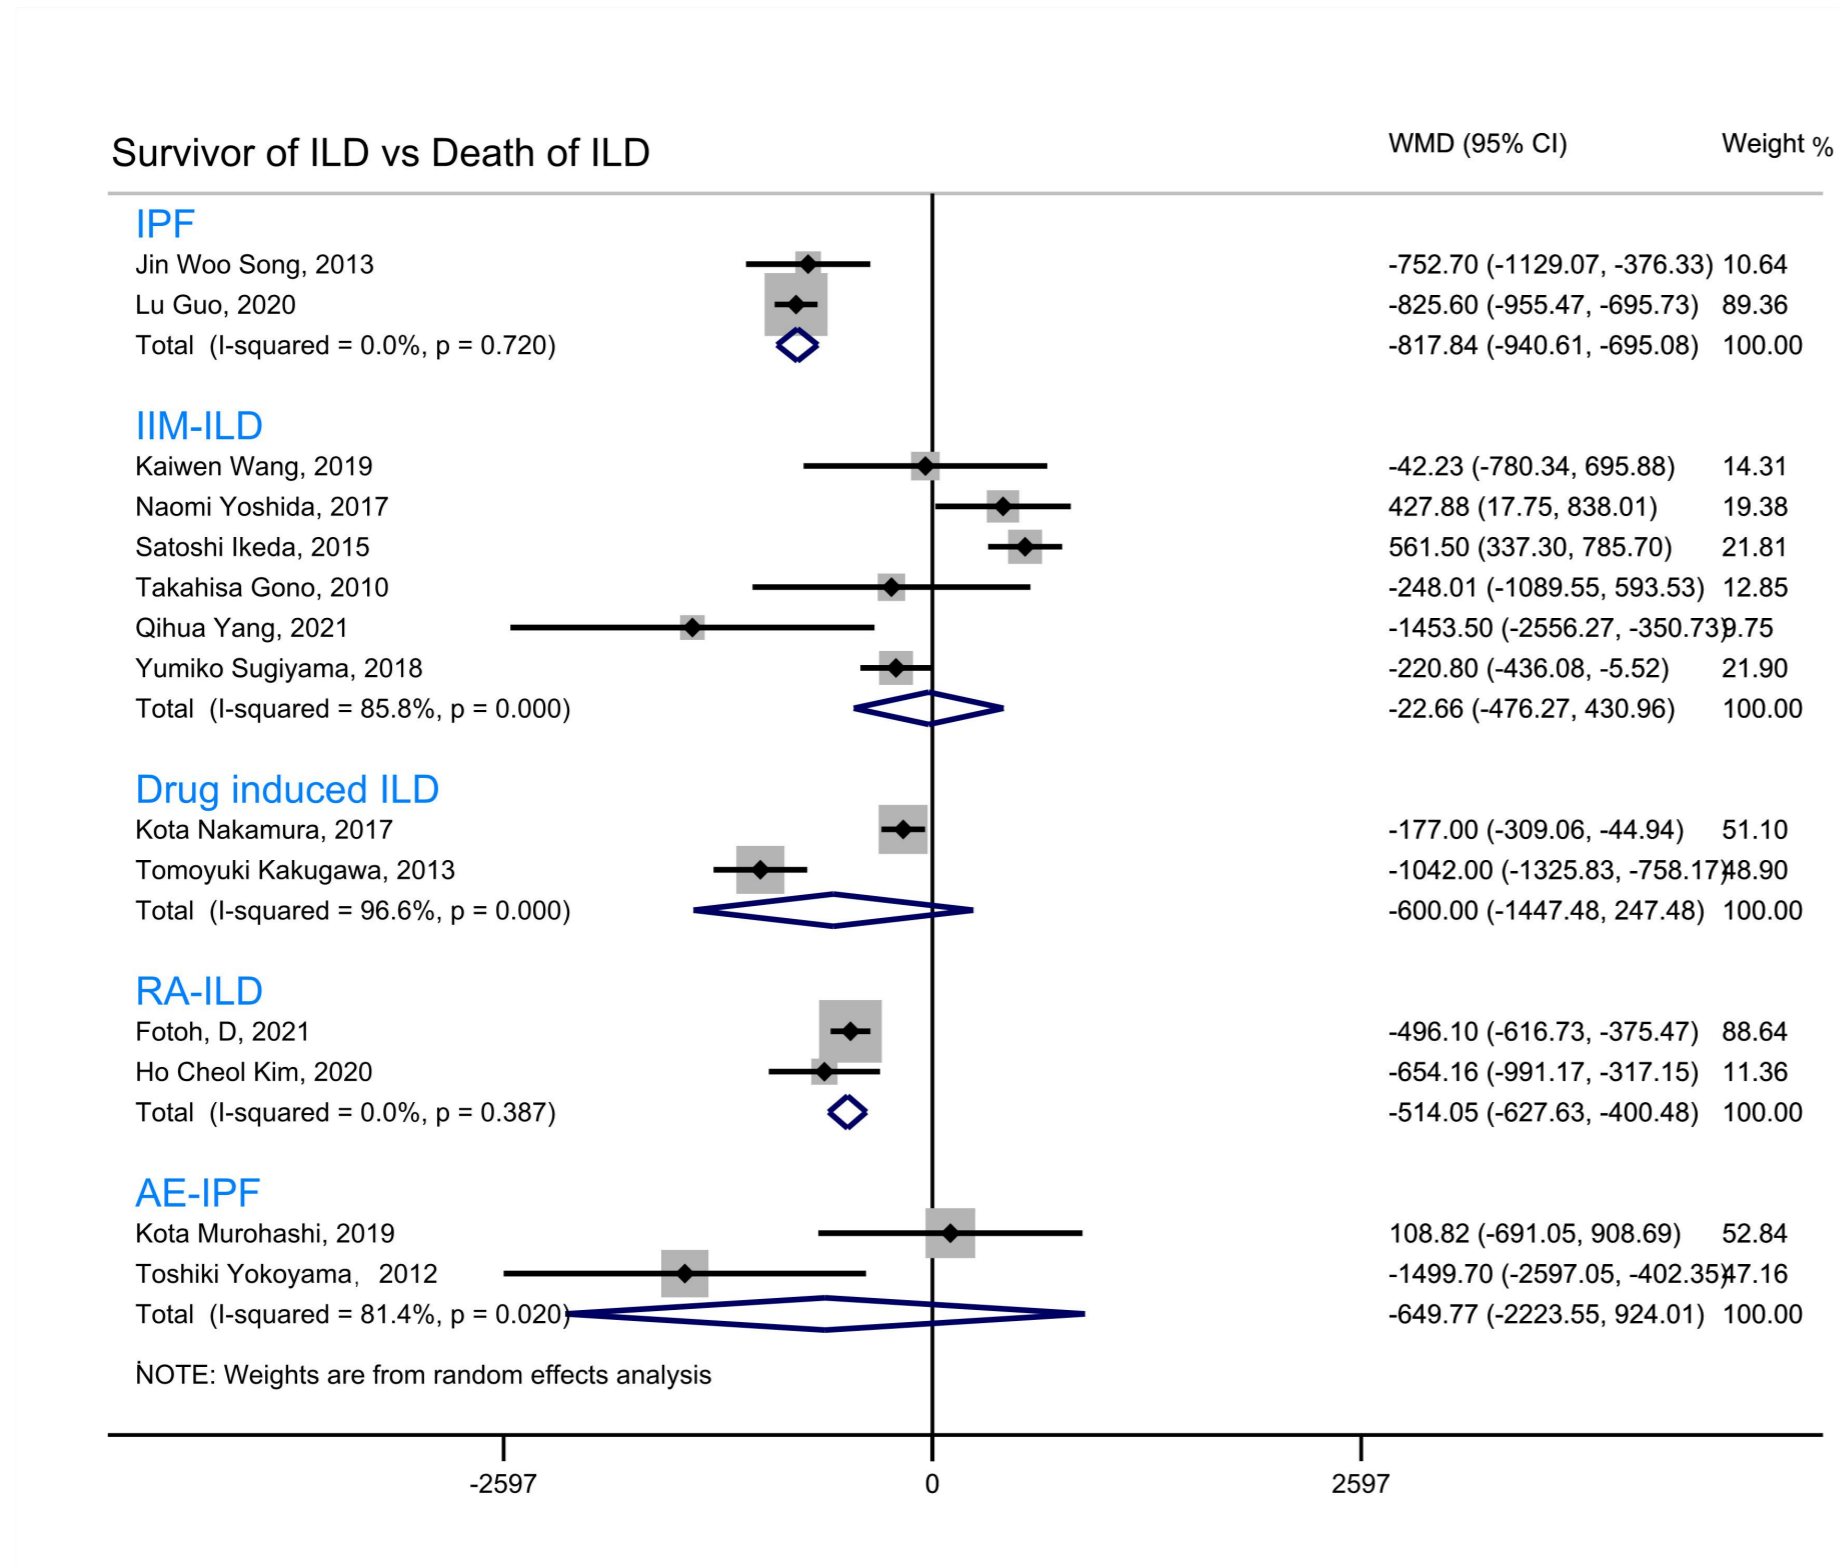

IPF: idiopathic pulmonary fibrosis

IIM-ILD: idiopathic inflammatory myopathy associated interstitial lung disease

Drug induced ILD: Drug induced interstitial lung disease

RA-ILD: rheumatoid arthritis-associated interstitial lung disease

AE-IPF: acute exacerbation of idiopathic pulmonary fibrosis
